# Supplementary material for: Linkage disequilibrium mapping for grain Fe and Zn enhancing QTLs useful for nutrient dense rice breeding
Source: PubMed Central journal article supplement (PMC7001215; doi:10.1186/s12870-020-2262-4), 2020-02-04
Supplement: 12870_2020_2262_MOESM2_ESM.pdf [file 12870_2020_2262_MOESM2_ESM.pdf]

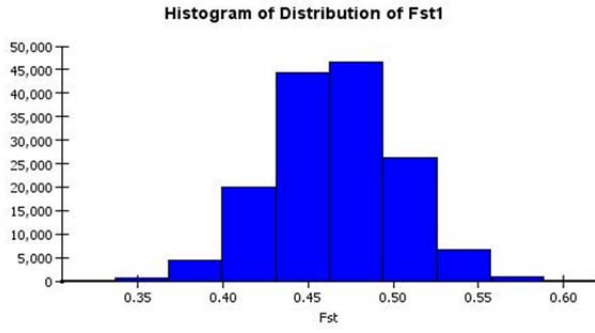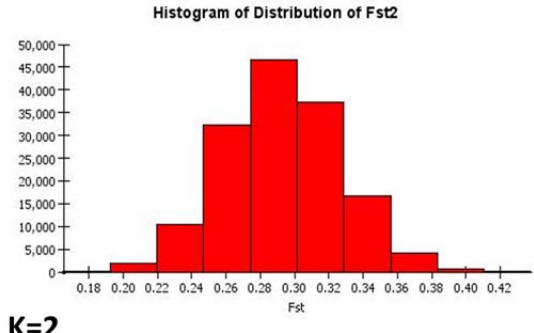

**K=2**

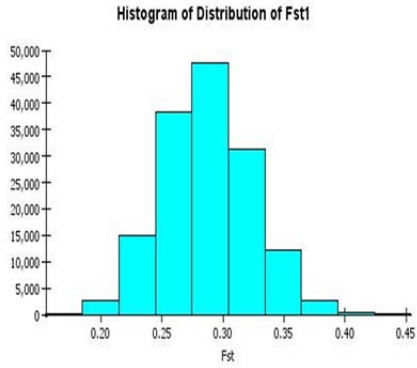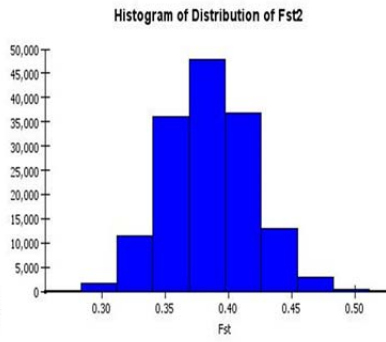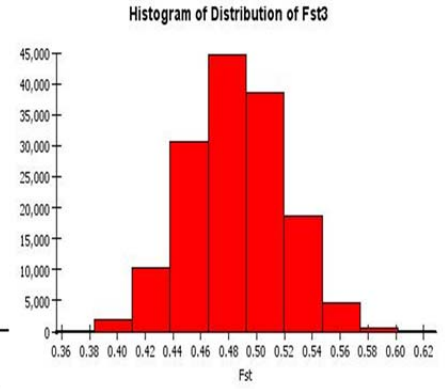

**K=3**
